# Supplementary material for: Assessing de novo parasite genomes assembled using only Oxford Nanopore Technologies MinION data
Source: PubMed Central journal article supplement — iScience. 2024 Jul 30;27(9):110614. doi: 10.1016/j.isci.2024.110614 (PMC11357801; doi:10.1016/j.isci.2024.110614), 2024-07-30
Supplement: mmc1.pdf [file mmc1.pdf]

iScience, Volume 27

## **Supplemental information**

**Assessing *de novo* parasite genomes  
assembled using only Oxford Nanopore  
Technologies MinION data**

**Kaylee S. Herzog, Rachel Wu, John M. Hawdon, Peter Nejsun, and Joseph R. Fauver**

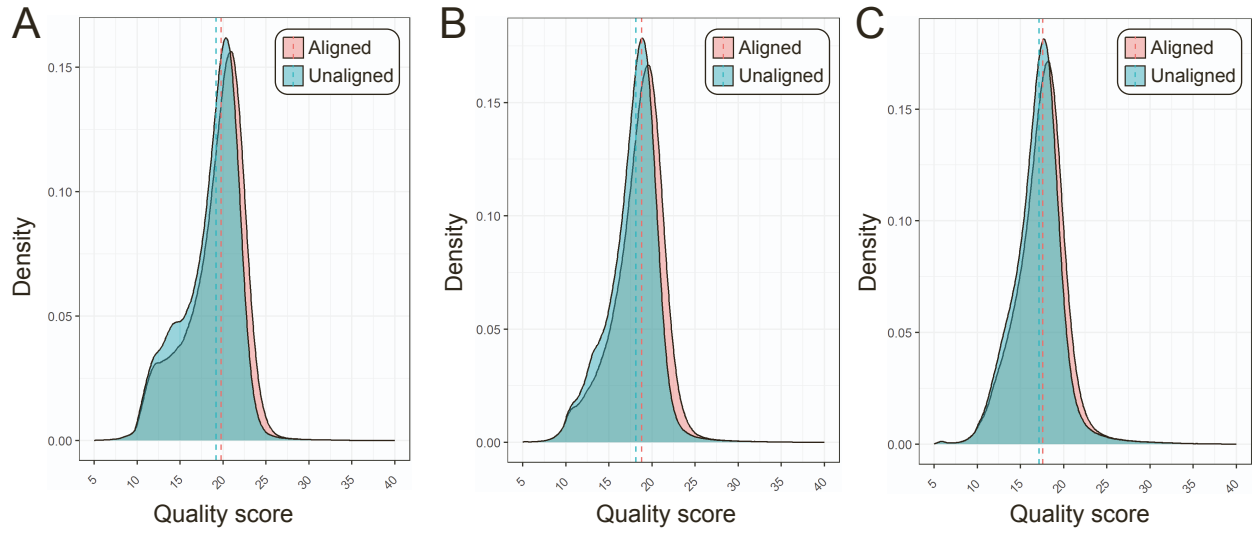

**Supplemental Figure 1. Histograms of average read quality scores (i.e., Q scores) for unaligned basecalled MinION read data, and for basecalled MinION read data aligned to the final MinION data only genome assembly, related to STAR Methods. (A) *Brugia malayi*. (B) *Trichuris trichiura*. (C) *Ancylostoma caninum*.**

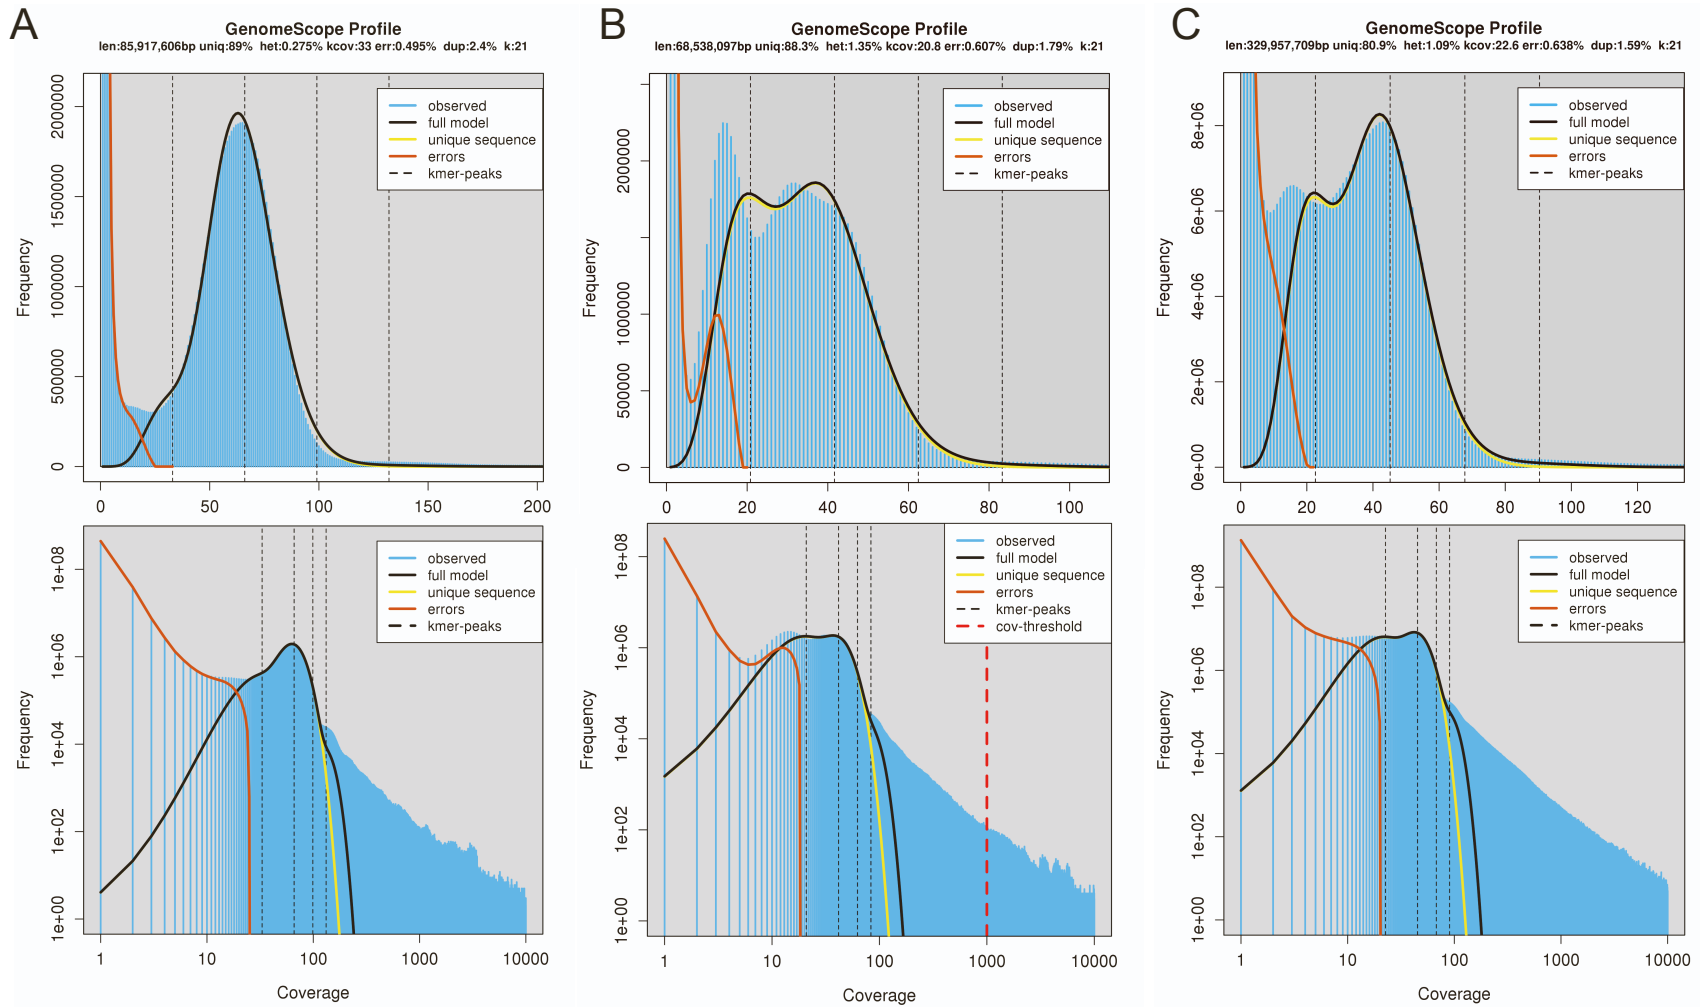

**Supplemental Figure 2. Focused (top) and complete (bottom) GenomeScope histograms based on quality-controlled Illumina read datasets generated for each species, realted to STAR Methods. (A) *Brugia malayi*. (B) *Trichuris trichiura*. (C) *Ancylostoma caninum*.**

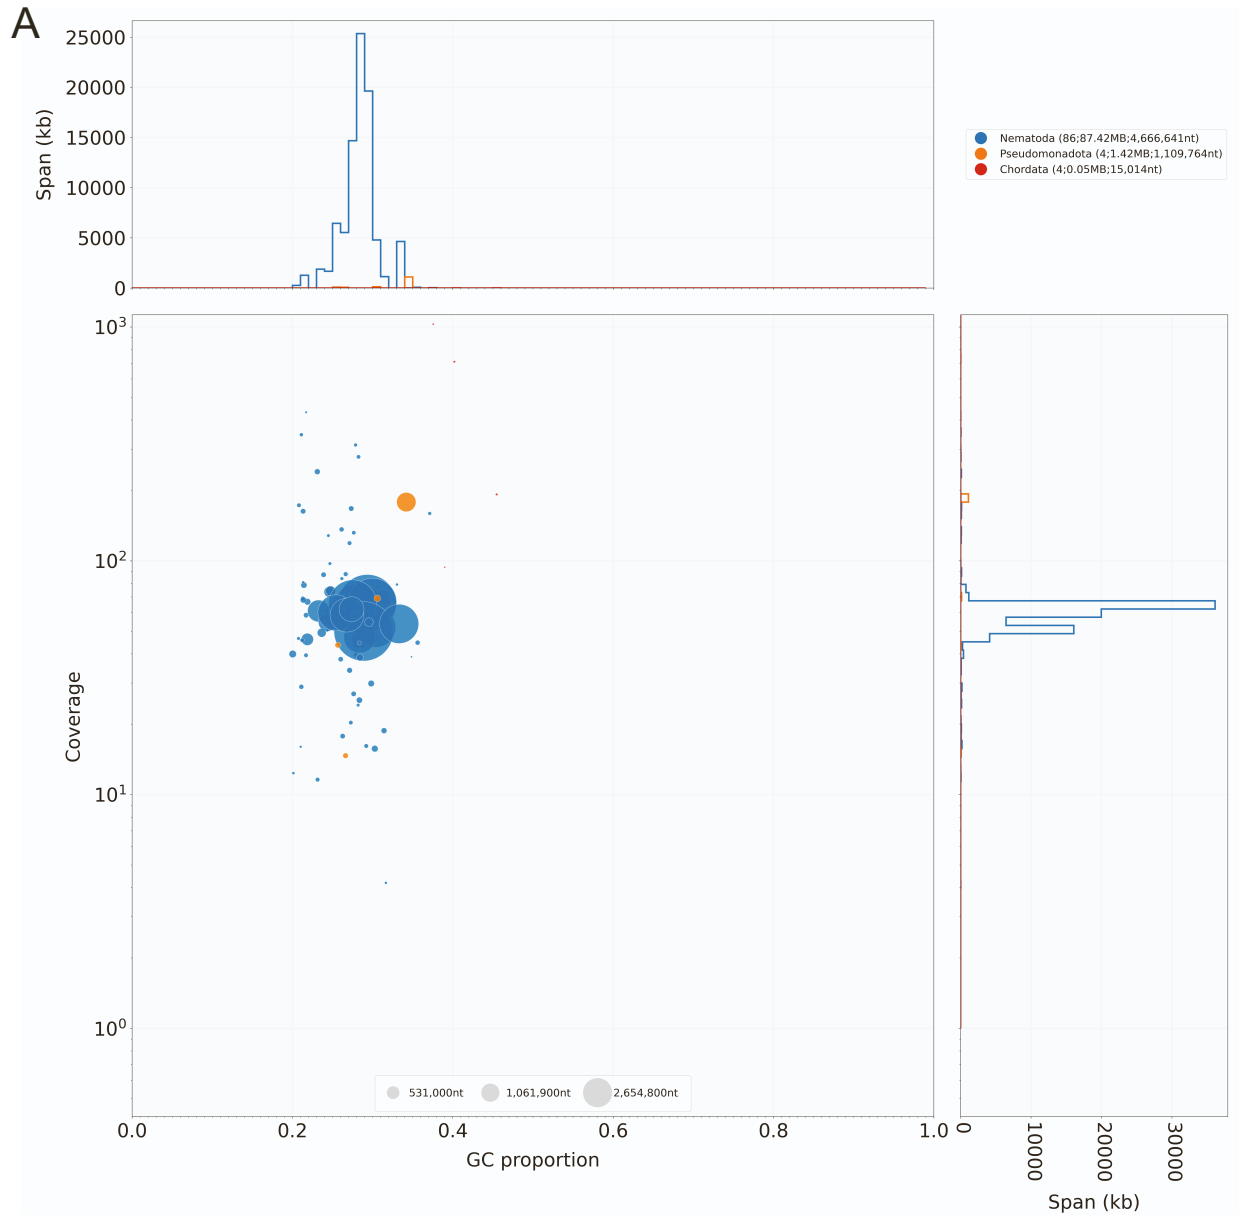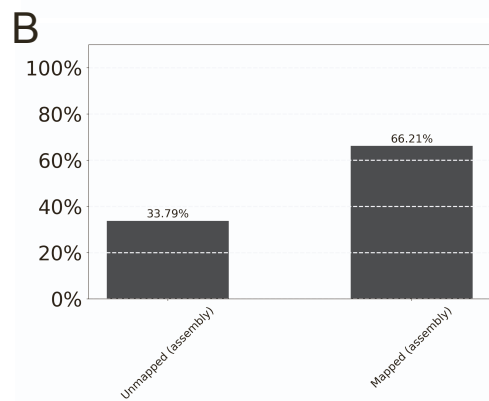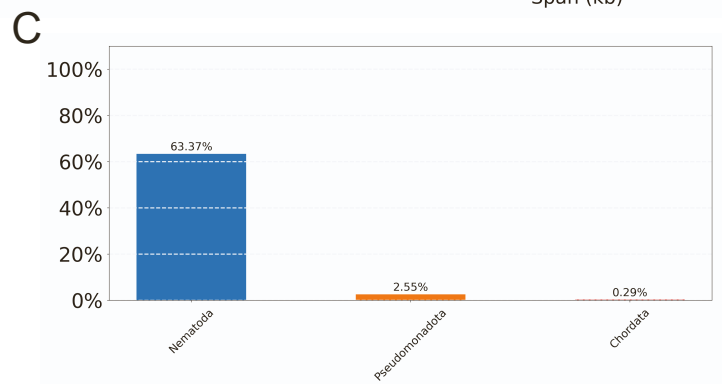

**Supplemental Figure 3. BlobTools output for the MinION data-only assembly generated for *Brugia malayi*, related to STAR Methods. (A) BlobPlot. (B–C) Read coverage plots.**



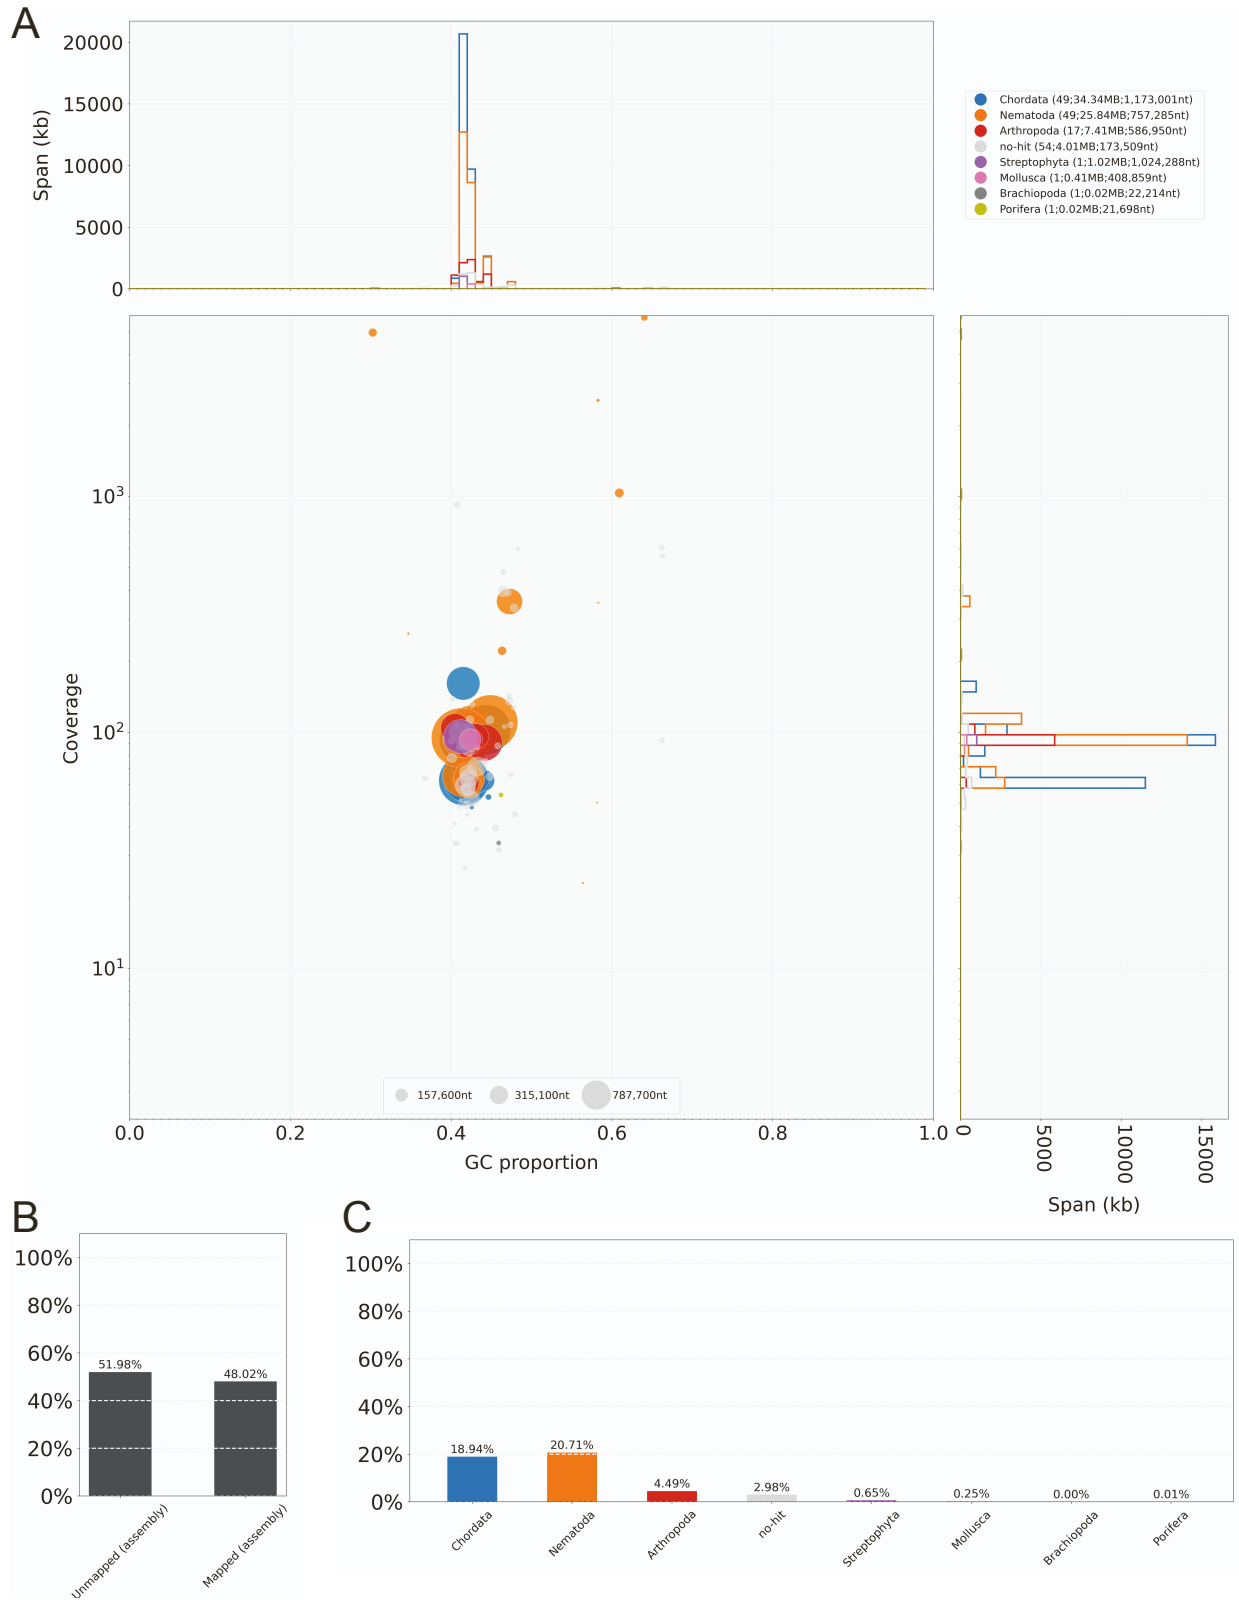

**Supplemental Figure 4. BlobTools output for the MinION data-only assembly generated for *Trichuris trichiura*, realted to STAR Methods. (A) BlobPlot. (B–C) Read coverage plots.**

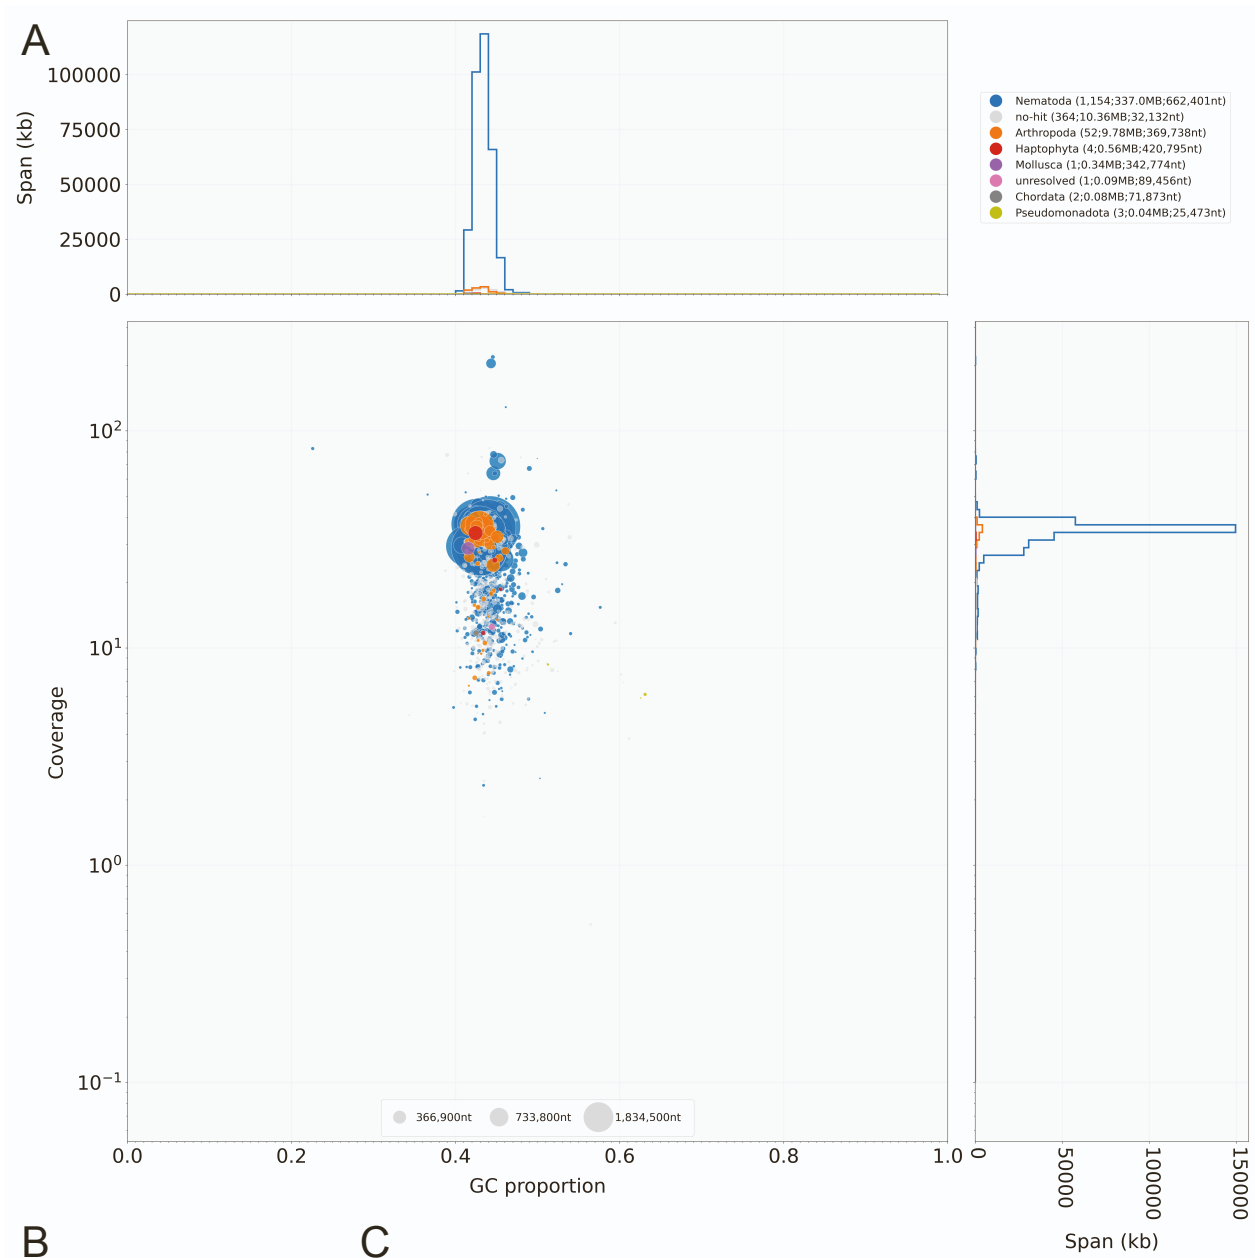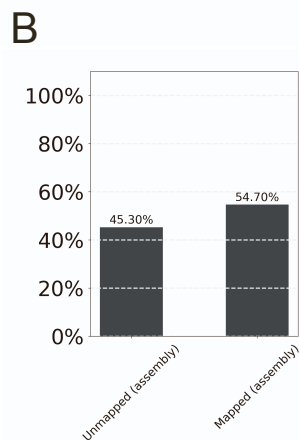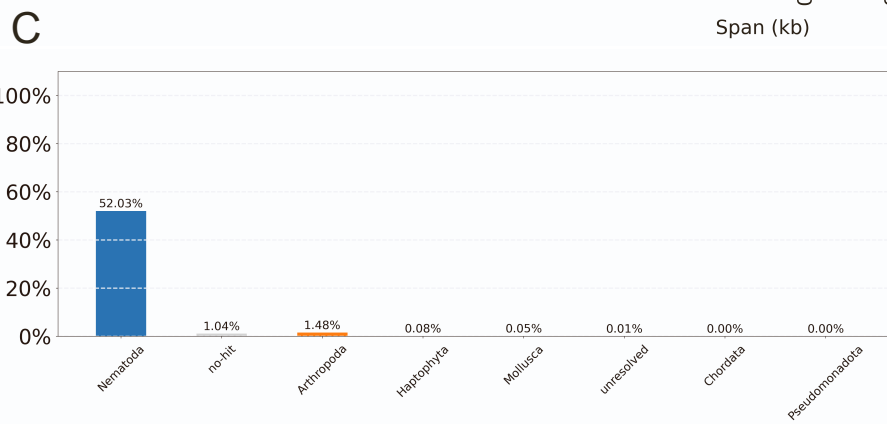

**Supplemental Figure 5. BlobTools output for the MinION data-only assembly generated for *Ancylostoma caninum*, realted to STAR Methods. (A) BlobPlot. (B–C) Read coverage**

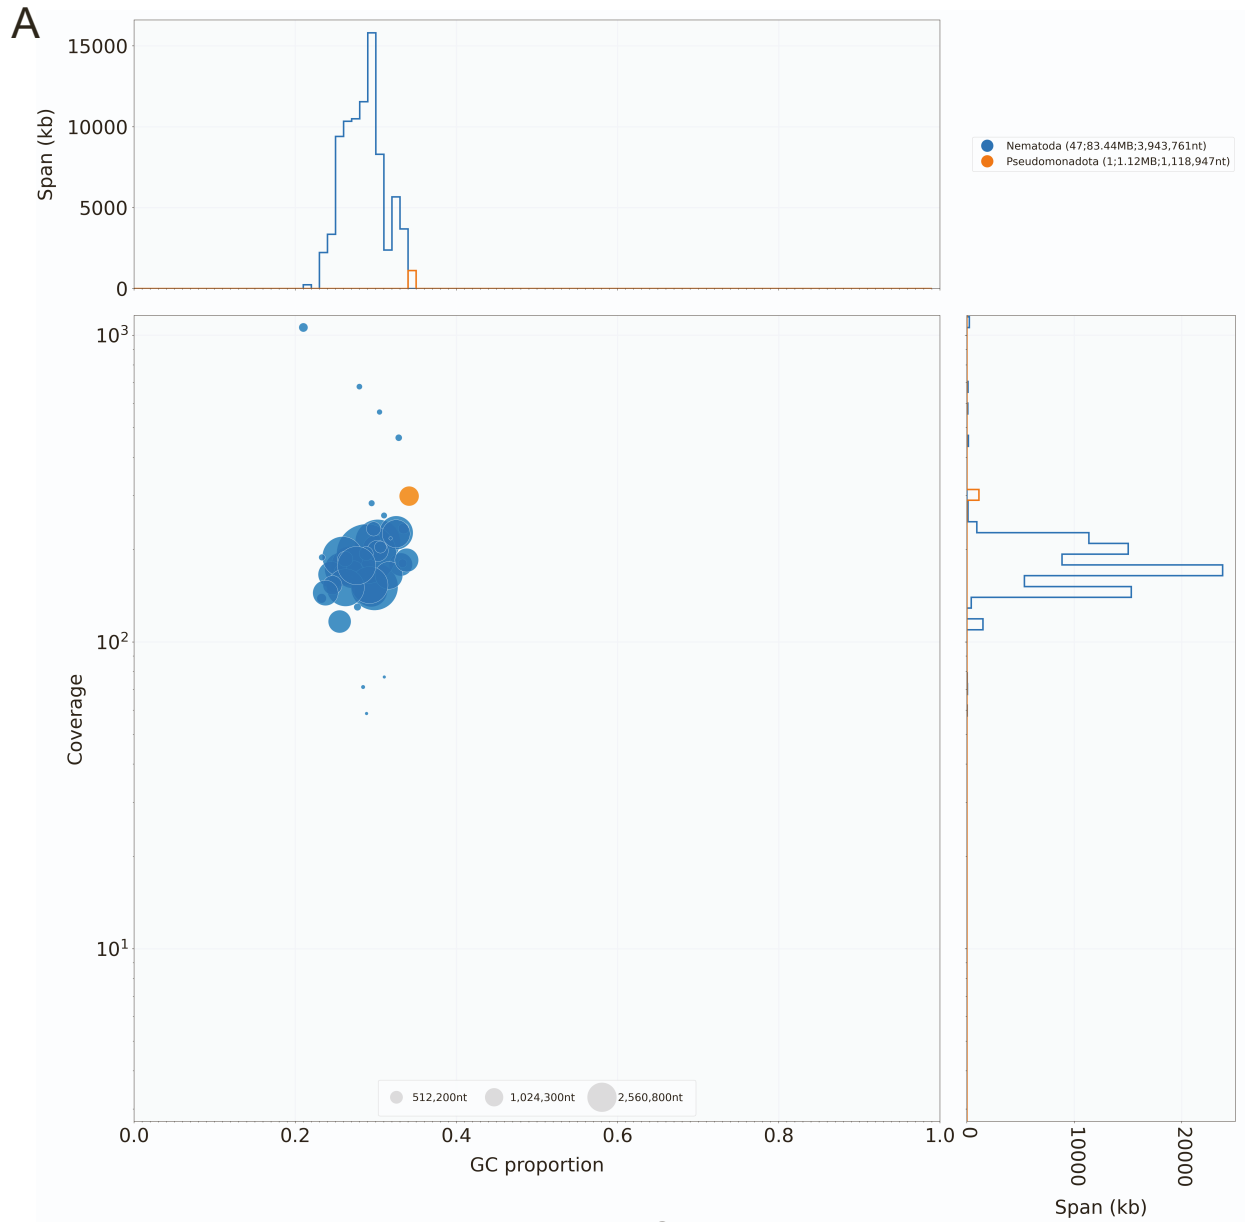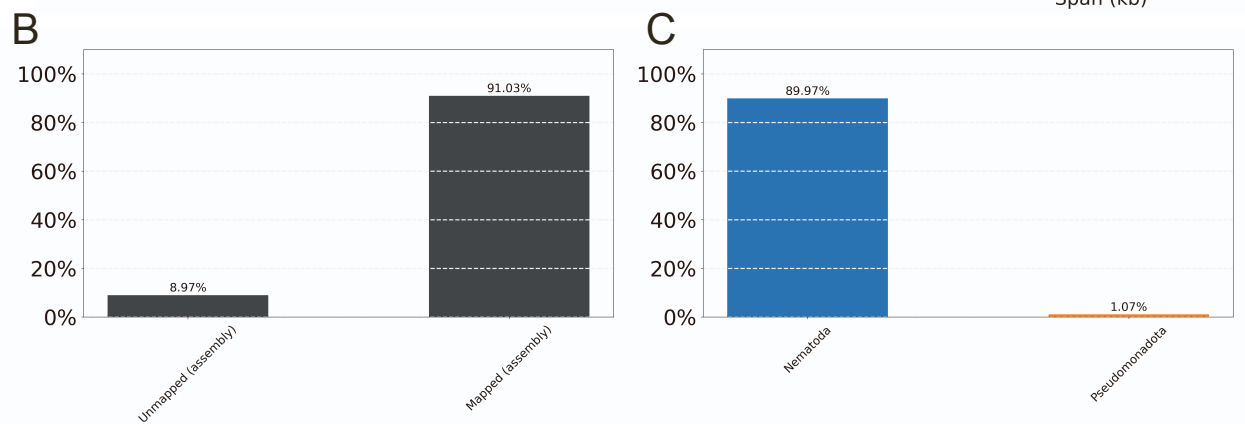

**Supplemental Figure 6. BlobTools output for the hybrid assembly generated for *Brugia malayi*, related to STAR Methods. (A) BlobPlot. (B–C) Read coverage plots.**

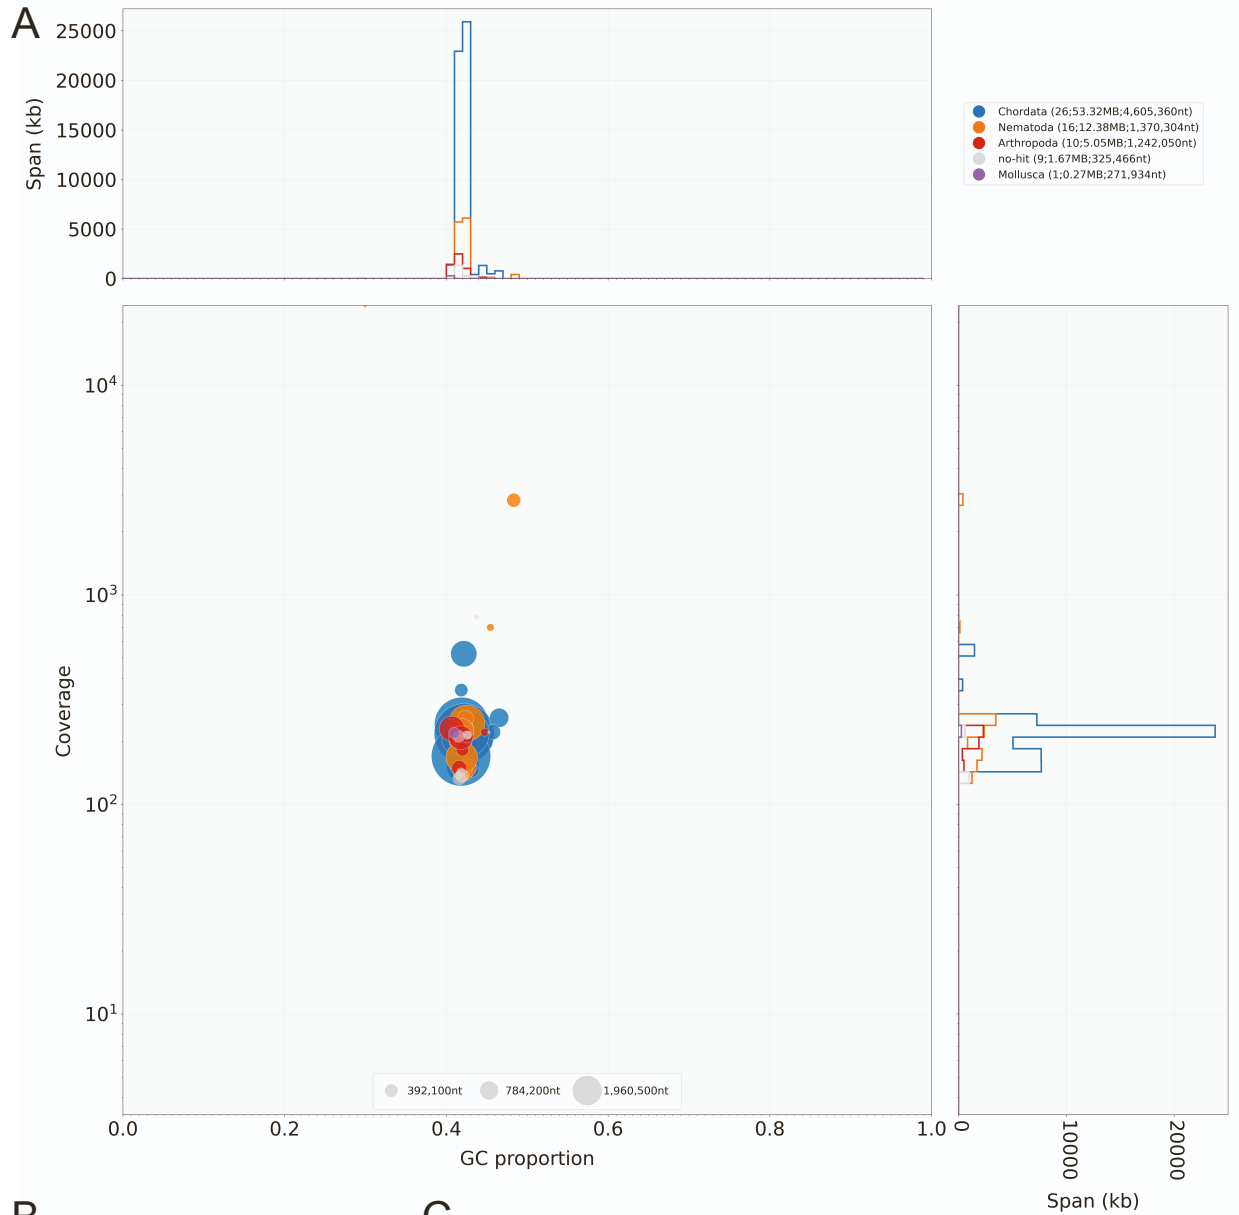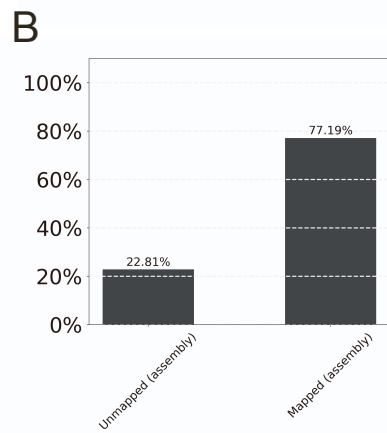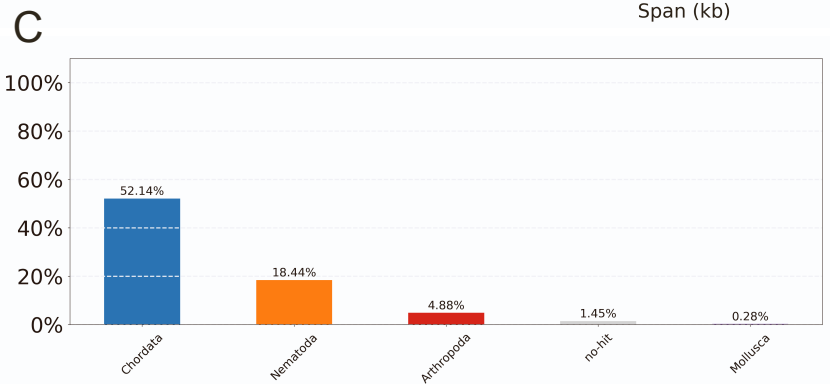

**Supplemental Figure 7. BlobTools output for the hybrid assembly generated for *Trichuris trichiura*, realted to STAR Methods. (A) BlobPlot. (B–C) Read coverage plots.**

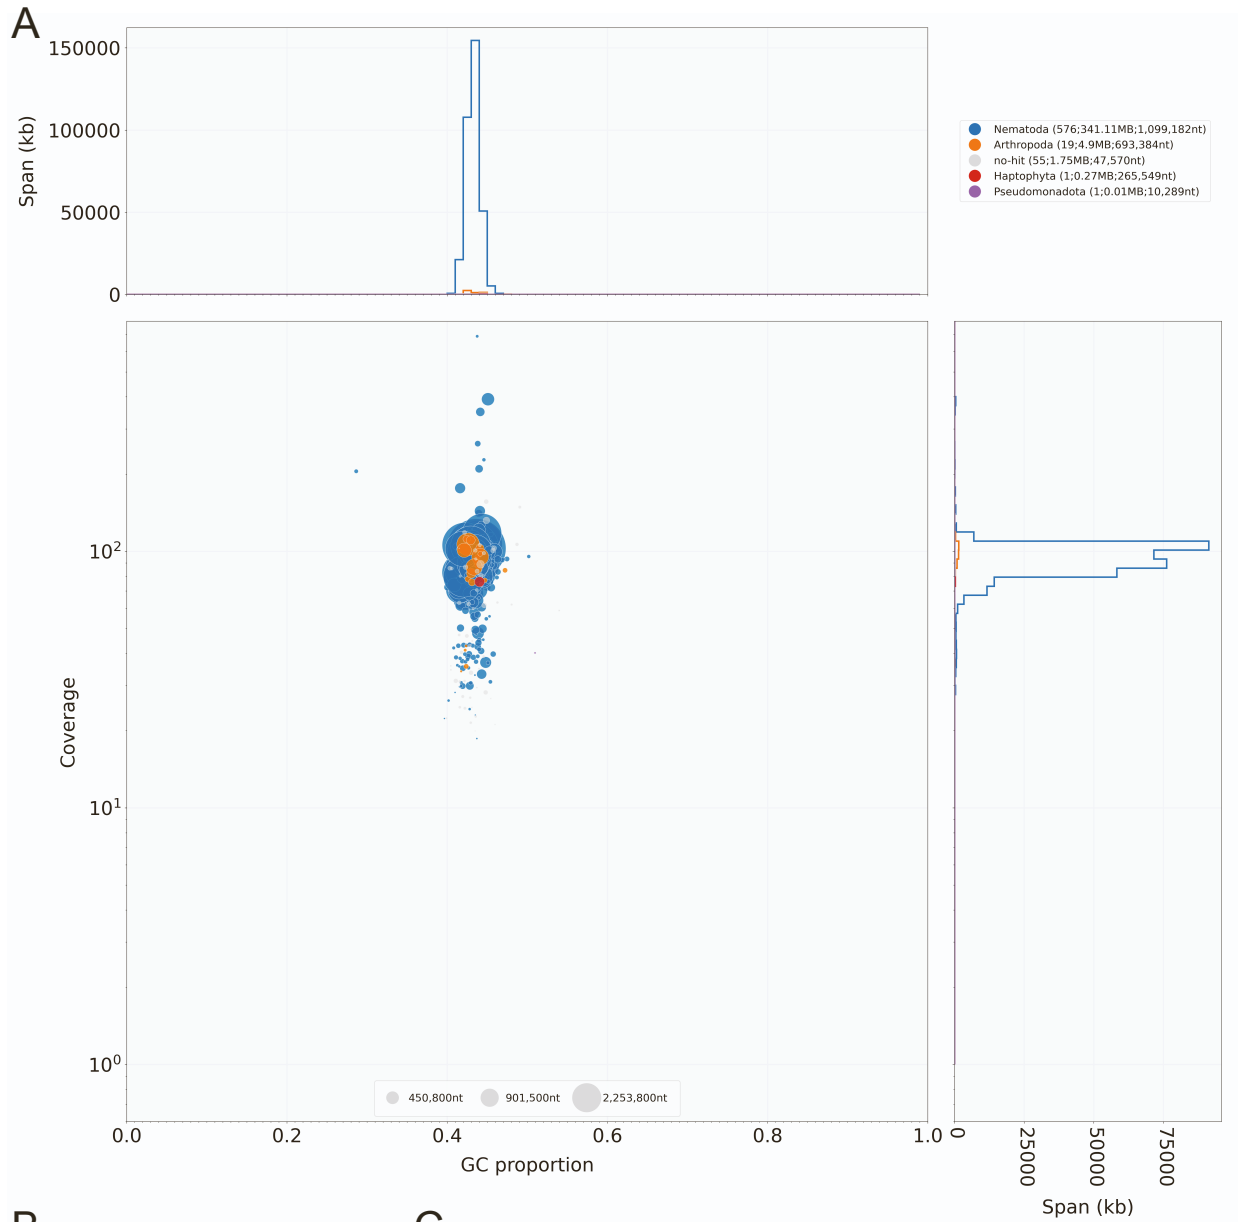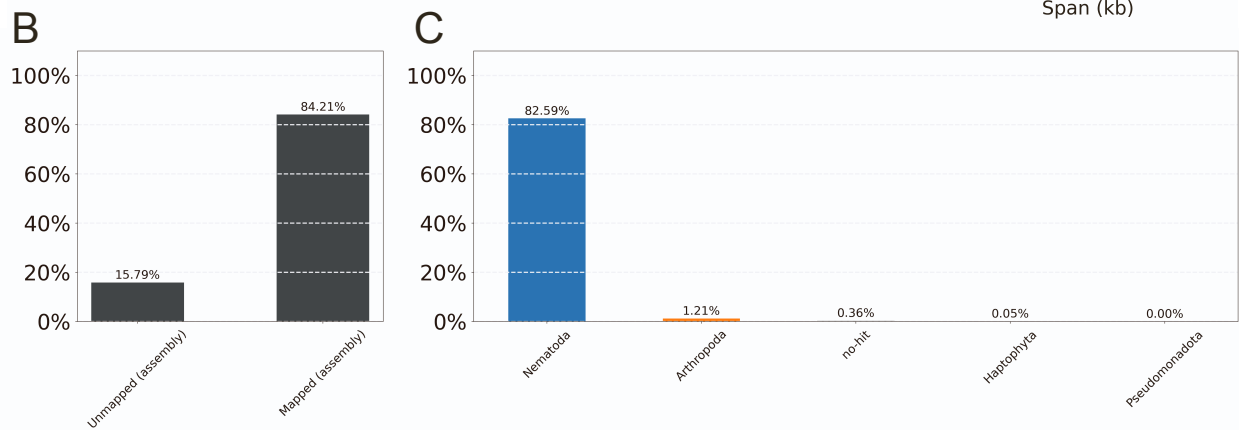

**Supplemental Figure 8. BlobTools output for the hybrid assembly generated for *Ancylostoma caninum*, related to STAR Methods. (A) BlobPlot. (B–C) Read coverage plots.**

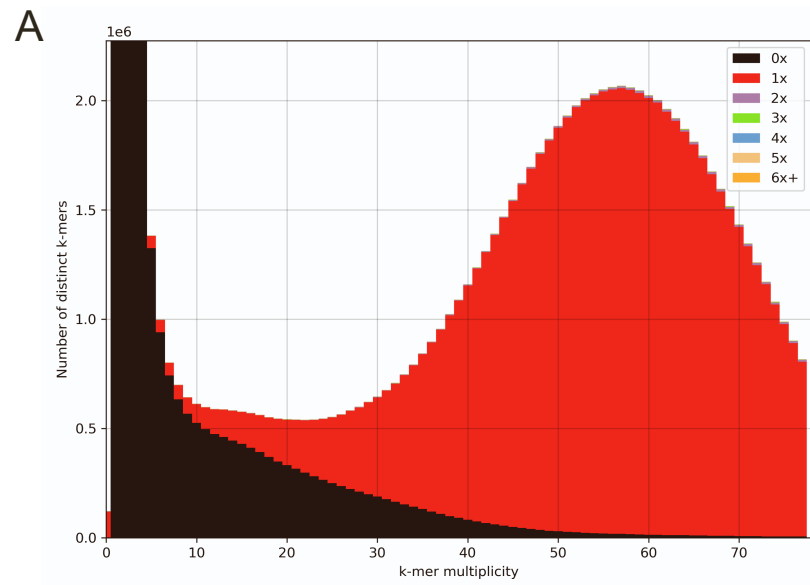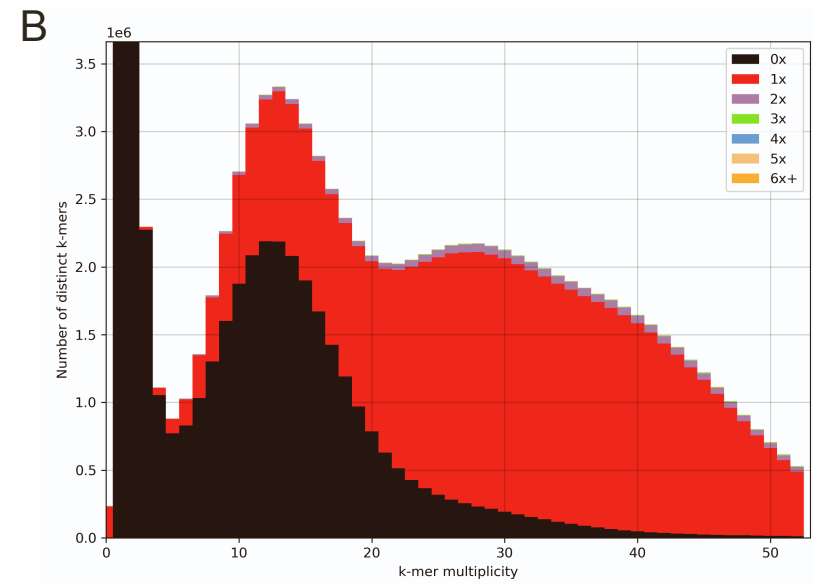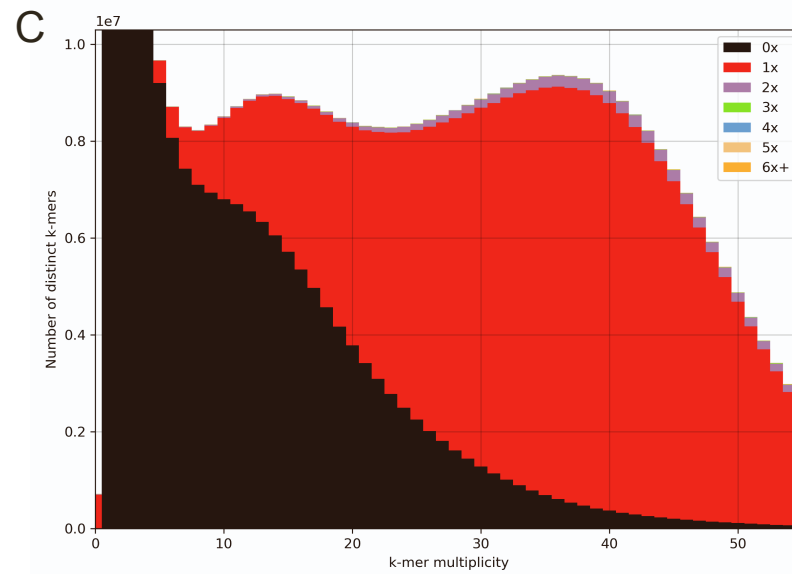

**Supplemental Figure 9. K-mer multiplicity plots generated from purged hybrid assemblies, realted to STAR Methods.**  
 (A) *Brugia malayi*. (B) *Trichuris trichiura*. (C) *Ancylostoma caninum*.

**Supplemental Table 1. Extraction and ONT MinION and Illumina sequence data generation details for each of the focal species sequenced, related to STAR Methods. Asterisk (\*) indicates amount of ONT MinION library remaining after the aliquot of the original library remaining following the first round of sequencing was rewashed with Long Fragment Buffer (LFB).**

|                 |                                                                | <i>Brugia malayi</i> | <i>Trichuris trichiura</i> |                              | <i>Ancylostoma caninum</i> |               |                         |
|-----------------|----------------------------------------------------------------|----------------------|----------------------------|------------------------------|----------------------------|---------------|-------------------------|
| Extraction      | Extracted material                                             | Single adult female  | Single adult male          |                              | Pooled L3 larvae           |               |                         |
|                 | Total amount of gDNA extracted (ng)                            | 737                  | 1,508                      |                              | 5,200                      |               |                         |
|                 | Mean fragment length of gDNA (bp)                              | >60,000              | —                          |                              | 33,504                     |               |                         |
| Illumina data   | gDNA input for library prep (ng)                               | 42                   | 40                         |                              | 400                        |               |                         |
|                 | No. PCR cycles                                                 | 7                    | 7                          |                              | 5                          |               |                         |
|                 | Data pre-quality control and filtering (bp)                    | 7,992,851,592        | 4,567,580,276              |                              | 20,844,376,730             |               |                         |
|                 | Data post-quality control and filtering (bp)                   | 7,850,596,985        | 4,442,501,155              |                              | 20,179,886,997             |               |                         |
| ONT MinION data | Library name                                                   | Bm ♀ C               | Tt ♂ 2D (all)              | Tt ♂ 2D (LFB washed aliquot) | Acan L3 B1                 | Acan L3 B2    | Acan L3 B1 + Acan L3 B2 |
|                 | Mean fragment length of gDNA post-additional bead cleanup (bp) | —                    | —                          | —                            | 31,955                     | 34,563        | —                       |
|                 | Amount of gDNA input for library prep (ng)                     | 500                  | 1,259                      | —                            | 406                        | 399           | —                       |
|                 | Amount of library generated (ng)                               | 287                  | 1,012                      | 483*                         | 189                        | 264           | —                       |
|                 | Amount of library sequenced (ng)                               | 134                  | 78.7                       | 76.2                         | 164                        | 125           | 25 (B1) + 123 (B2)      |
|                 | No. pores available at start of sequencing                     | 1,413                | 1,544                      | 1,635                        | 1,527                      | 1,465         | 1,538                   |
|                 | Total sequencing run time (hr)                                 | 72                   | 72                         | 62.75                        | 80                         | 67.75         | 80                      |
|                 | MinKNOW estimated read N50 (kb)                                | 8.65                 | 2.72                       | 5.59                         | 6.68                       | 6.54          | 6.64                    |
|                 | MinKNOW estimated data generated (Gb)                          | 15.91                | 14.06                      | 12.76                        | 10.86                      | 10.73         | 11.56                   |
|                 | Data post-basecalling with Guppy (bp)                          | 11,349,419,698       | 11,891,465,167             | 10,868,016,523               | 8,521,058,505              | 8,261,315,652 | 7,784,337,997           |
| Assembly        | Est. depth of coverage for Illumina reads                      | 82.95×               | 48.58×                     |                              | 38.64×                     |               |                         |
|                 | Proportion of Illumina reads that mapped to reference assembly | 95.74%               | 90.71%                     |                              | 90.31%                     |               |                         |
|                 | Est. depth of coverage for MinION reads                        | 124.85×              | 249.91×                    |                              | 49.42×                     |               |                         |
|                 | Proportion of MinION reads that mapped to reference assembly   | 98.77%               | 99.91%                     |                              | 99.85%                     |               |                         |
|                 | GenomeScope estimated genome size (bp)                         | 85,917,606           | 68,538,097                 |                              | 329,957,709                |               |                         |
|                 | GenomeScope estimated heterozygosity                           | 0.28%                | 1.35%                      |                              | 1.09%                      |               |                         |

**Supplemental Table 2. Comparison of different long read and hybrid *de novo* assemblers for *Brugia malayi*, related to STAR Methods.** All QUASt and compleasm comparative data were generated from raw assemblies output by each assembler (i.e., from assemblies that were not purged for duplication, not polished, did not have contigs suspected as contamination removed, and did not have organellar genomes refined or added). “Popped” for the canu assembly indicates the raw assembly output by canu from which contigs indicated as potential alternative alleles (i.e., with FASTA headers including “suggestBubble=yes”) were removed.

|                                       |                      | QUASt       |            |             |        | Compleasm (Nematoda) |             |            |                |
|---------------------------------------|----------------------|-------------|------------|-------------|--------|----------------------|-------------|------------|----------------|
|                                       |                      | Size (bp)   | N50 (bp)   | No. contigs | GC     | Single copy          | Duplicated  | Fragmented | Missing        |
| <b>Ghedin et al. (2007) reference</b> |                      | 88,235,797  | 14,214,749 | 197         | 28.49% | 3,097 (98.91%)       | 16 (0.51%)  | 10 (0.32%) | 8 (0.26%)      |
| <b>MinION data only</b>               | <b>canu</b>          | 101,963,718 | 4,682,872  | 319         | 28.36% | 2,979 (95.15%)       | 134 (4.28%) | 10 (0.32%) | 8 (0.26%)      |
|                                       | <b>canu (popped)</b> | 95,068,481  | 6,405,829  | 195         | 28.47% | 3,044 (97.22%)       | 69 (2.20%)  | 10 (0.32%) | 8 (0.26%)      |
|                                       | <b>wtdbg2</b>        | 94,153,502  | 2,614,318  | 650         | 28.16% | 2,930 (93.58%)       | 32 (1.02%)  | 13 (0.42%) | 156 (4.98%)    |
|                                       | <b>Flye</b>          | 84,647,476  | 3,811,129  | 167         | 28.62% | 3,097 (98.91%)       | 12 (0.38%)  | 11 (0.35%) | 11 (0.35%)     |
|                                       | <b>shasta</b>        | 49,567,258  | 26,897     | 2,171       | 28.00% | 1,515 (48.39%)       | 78 (2.49%)  | 81 (2.59%) | 1,457 (46.53%) |
| <b>Hybrid</b>                         | <b>MaSuRCA</b>       | 86,029,419  | 2,961,229  | 57          | 28.56% | 3,062 (97.80%)       | 50 (1.60%)  | 11 (0.35%) | 8 (0.26%)      |
|                                       | <b>WENGAN</b>        | 81,095,327  | 2,941,126  | 105         | 28.59% | 3,094 (98.82%)       | 8 (0.26%)   | 13 (0.42%) | 16 (0.51%)     |
|                                       | <b>HASLR</b>         | 81,702,517  | 1,358,706  | 180         | 28.46% | 3,026 (96.65%)       | 8 (0.26%)   | 12 (0.38%) | 85 (2.71%)     |



**Supplemental Table 3. Scores from compleasm for the assemblies generated as part of this study and the reference assemblies available for each species using the Metazoa and Eukaryota BUSCO databases, related to Table 2, Figure 2, and STAR Methods.** Scores within each category are presented as number of BUSCOs recovered in each assembly followed in parentheses by proportion of the total number of orthologs assessed by compleasm (954 and 255 for the Metazoa and Eukaryota databases, respectively).

|                            |                                                                     | Metazoa Database |            |            |              | Eukaryota Database |            |            |            |
|----------------------------|---------------------------------------------------------------------|------------------|------------|------------|--------------|--------------------|------------|------------|------------|
|                            |                                                                     | Single           | Duplicated | Fragmented | Missing      | Single             | Duplicated | Fragmented | Missing    |
| <i>Brugia malayi</i>       | Ghedini et al. (2007) reference assembly                            | 772 (80.92%)     | 6 (0.63%)  | 13 (1.36%) | 163 (17.09%) | 251 (98.43%)       | 0 (0%)     | 1 (0.39%)  | 3 (1.18%)  |
|                            | MinION data only assembly                                           | 775 (81.24%)     | 4 (0.42%)  | 12 (1.26%) | 163 (17.09%) | 251 (98.43%)       | 0 (0%)     | 1 (0.39%)  | 3 (1.18%)  |
|                            | MinION assembly polished with Illumina data                         | 775 (81.24%)     | 4 (0.42%)  | 12 (1.26%) | 163 (17.09%) | 251 (98.43%)       | 0 (0%)     | 1 (0.39%)  | 3 (1.18%)  |
|                            | Hybrid assembly                                                     | 775 (81.24%)     | 3 (0.31%)  | 12 (1.26%) | 164 (17.19%) | 250 (98.04%)       | 1 (0.39%)  | 1 (0.39%)  | 3 (1.18%)  |
| <i>Trichuris trichiura</i> | Foth et al. (2014) reference assembly                               | 667 (69.92%)     | 24 (2.52%) | 23 (2.41%) | 240 (25.16%) | 217 (85.10%)       | 10 (3.92%) | 8 (3.14%)  | 20 (7.84%) |
|                            | Doyle et al. (2022) reference assembly                              | 667 (69.92%)     | 24 (2.52%) | 23 (2.41%) | 240 (25.16%) | 217 (85.10%)       | 10 (3.92%) | 8 (3.14%)  | 20 (7.84%) |
|                            | MinION data only assembly                                           | 676 (70.86%)     | 10 (1.05%) | 22 (2.31%) | 246 (25.79%) | 219 (85.88%)       | 6 (2.35%)  | 8 (3.14%)  | 22 (8.63%) |
|                            | MinION assembly polished with Illumina data                         | 676 (70.86%)     | 10 (1.05%) | 22 (2.31%) | 246 (25.79%) | 218 (85.49%)       | 6 (2.35%)  | 9 (3.53%)  | 22 (8.63%) |
|                            | Hybrid assembly                                                     | 679 (71.17%)     | 10 (1.05%) | 21 (2.20%) | 244 (25.58%) | 222 (87.06%)       | 5 (1.96%)  | 7 (2.75%)  | 21 (8.24%) |
| <i>Ancylostoma caninum</i> | International Helminth Genomes Consortium (2019) reference assembly | 643 (67.40%)     | 68 (7.13%) | 37 (3.88%) | 206 (21.59%) | 215 (84.31%)       | 18 (7.06%) | 14 (5.49%) | 8 (3.14%)  |
|                            | MinION data only assembly                                           | 678 (71.07%)     | 41 (4.30%) | 19 (1.99%) | 216 (22.64%) | 228 (89.41%)       | 11 (4.31%) | 6 (2.35%)  | 10 (3.92%) |
|                            | MinION assembly polished with Illumina data                         | 681 (71.38%)     | 40 (4.19%) | 20 (2.10%) | 213 (22.33%) | 228 (89.41%)       | 11 (4.31%) | 6 (2.35%)  | 10 (3.92%) |
|                            | Hybrid assembly                                                     | 693 (72.64%)     | 30 (3.14%) | 21 (2.20%) | 210 (22.01%) | 234 (91.76%)       | 7 (2.75%)  | 6 (2.35%)  | 8 (3.14%)  |

**Supplemental Table 4. Distance matrix for assemblies of the genome of the *Wolbachia* endosymbiont of *Brugia malayi* from both the MinION data only and hybrid assemblies generated herein compared to existing reference assemblies, related to STAR Methods. *Wolbachia* reference assemblies were obtained from Foster et al. (2005) (AE017321.1) and Lefoulon et al. (2019) (CP034333.1).**

|                           | AE017321.1 reference | MinION data only assembly | CP034333.1 reference | Hybrid assembly |
|---------------------------|----------------------|---------------------------|----------------------|-----------------|
| AE017321.1 reference      | —                    | 23                        | 39                   | 184             |
| MinION data only assembly | 23                   | —                         | 18                   | 169             |
| CP034333.1 reference      | 39                   | 18                        | —                    |                 |
| Hybrid assembly           | 184                  | 169                       | 185                  | —               |

**Supplemental Table 5. Genome-wide pairwise comparison statistics from MuMmer4 for the MinION data only assemblies versus the hybrid and Illumina data-polished MinION assemblies for each species, related to STAR Methods.**

|                     |                                                                           | Genome-wide nucleotide-level pairwise identity where aligned | No. gSNPS | No. gIndels |
|---------------------|---------------------------------------------------------------------------|--------------------------------------------------------------|-----------|-------------|
| <i>B. malayi</i>    | MinION data only assembly vs. hybrid                                      | 99.57%                                                       | 35,115    | 36,140      |
|                     | MinION data only assembly vs. MinION assembly polished with Illumina data | 99.89%                                                       | 7,300     | 15,338      |
| <i>T. trichiura</i> | MinION data only assembly vs. hybrid                                      | 99.22%                                                       | 150,681   | 9,434       |
|                     | MinION data only assembly vs. MinION assembly polished with Illumina data | 99.86%                                                       | 23,322    | 4,413       |
| <i>A. caninum</i>   | MinION data only assembly vs. hybrid                                      | 99.04%                                                       | 299,510   | 49,610      |
|                     | MinION data only assembly vs. MinION assembly polished with Illumina data | 99.74%                                                       | 147,516   | 45,902      |
